# Supplementary material
Source: publisher site journal article supplement (https://www.spandidos-publications.com/8659/downloadSupplementary)
Supplement: Supplementary file 1 [file downloadSupplementary]

## Sheet: Sheet1
Table SIV. Sensitivity analysis results.
id.exposure	id.outcome	outcome	exposure	method	nsnp	b	se	pval	lo_ci	up_ci	or	or_lci95	or_uci95
fJCrI3	renal_carcinoma	outcome	cg07431106	MR Egger	9	0.0828984968963022	0.540489309833688	0.882429042047576	-0.976460550377727	1.14225754417033	1.08643152677944	0.37664184724765	3.1338351566766
fJCrI3	renal_carcinoma	outcome	cg07431106	Weighted median	9	-0.128039082450462	0.887210579073239	0.885250587927206	-1.86697181743401	1.61089365253309	0.879818992990491	0.15459108376316	5.00728400101476
fJCrI3	renal_carcinoma	outcome	cg07431106	Inverse variance weighted	9	-0.138269132831841	0.347387162510238	0.690610999108711	-0.819147971351908	0.542609705688226	0.870864282033166	0.440807074804878	1.72049098362781
fJCrI3	renal_carcinoma	outcome	cg07431106	Simple mode	9	-0.296029889898151	1.25538473836752	0.819506333309964	-2.7565839770985	2.1645241973022	0.743765196621959	0.0635083441932319	8.71045647203403
fJCrI3	renal_carcinoma	outcome	cg07431106	Weighted mode	9	-0.191914476667684	1.07090910276425	0.862230696629453	-2.29089631808562	1.90706736475026	0.825377454503592	0.10117573555854	6.73331346337144
LRucJA	renal_carcinoma	outcome	SeqId_17161_1	MR Egger	3	-22.281441235216	63.5754045148713	0.78539812515746	-146.889234084364	102.326351613932	2.10519835842247e-10	1.60996407849741e-64	2.7527695726236e+44
LRucJA	renal_carcinoma	outcome	SeqId_17161_1	Weighted median	3	1.62853653433104	10.283473796229	0.874169635567409	-18.5270721062778	21.7841451749398	5.09641083600753	8.99072716025104e-09	2888910201.19109
LRucJA	renal_carcinoma	outcome	SeqId_17161_1	Inverse variance weighted	3	2.76285748241749	1.99611472602085	0.166322455004262	-1.14952738058337	6.67524234541836	15.8450552876526	0.316786453433288	792.539498920336
LRucJA	renal_carcinoma	outcome	SeqId_17161_1	Simple mode	3	1.62951935035278	3.17031857243144	0.658413761148946	-4.58430505161284	7.8433437523184	5.10142213241836	0.0102108433317448	2548.71286607829
LRucJA	renal_carcinoma	outcome	SeqId_17161_1	Weighted mode	3	1.61381240933044	2.92856502245057	0.636931633916902	-4.12617503467267	7.35379985333355	5.02192039487526	0.0161445130757449	1562.12109551656
4Rffun	renal_carcinoma	outcome	SeqId_3448_13	Inverse variance weighted	2	-1.0338440874402	5.6228502446217	0.854119540191454	-12.0546305668987	9.98694239201834	0.355637228966696	5.81755453856901e-06	21740.7224614039
ZTeVw3	renal_carcinoma	outcome	SeqId_4125_52	MR Egger	9	0.142009089690909	0.867029954261473	0.874526785635422	-1.55736962066158	1.8413878000434	1.1525871251501	0.210689536373272	6.30528266343611
ZTeVw3	renal_carcinoma	outcome	SeqId_4125_52	Weighted median	9	0.245144278194411	0.452143736256371	0.587693007625671	-0.641057444868075	1.1313460012569	1.27780565939934	0.526735136077848	3.09982606315383
ZTeVw3	renal_carcinoma	outcome	SeqId_4125_52	Inverse variance weighted	9	0.128858887564616	0.365466112223747	0.724397495208036	-0.587454692393927	0.84517246752316	1.13752959326832	0.555740015342868	2.32837934976278
ZTeVw3	renal_carcinoma	outcome	SeqId_4125_52	Simple mode	9	-0.590597175567519	0.723214625314138	0.437780830616799	-2.00809784118323	0.826903490048191	0.553996352845708	0.134243784960899	2.28622843922152
ZTeVw3	renal_carcinoma	outcome	SeqId_4125_52	Weighted mode	9	0.260810533187882	0.388867077888091	0.521304315601733	-0.501368939472777	1.02299000584854	1.29798171767672	0.605700924009658	2.78149904125975
LYjIgy	renal_carcinoma	outcome	cg08884395	MR Egger	9	-1.61523718610748	0.744728283054833	0.0667258421995436	-3.07490462089495	-0.155569751320005	0.198843501930963	0.046194034117202	0.855927372782652
LYjIgy	renal_carcinoma	outcome	cg08884395	Weighted median	9	-0.262814902177197	1.27787783532018	0.837052503930453	-2.76745545940475	2.24182565505036	0.768884202932474	0.062821653787598	9.41049593374148
LYjIgy	renal_carcinoma	outcome	cg08884395	Inverse variance weighted	9	-0.437573623736842	0.529647225400767	0.408713044183793	-1.47568218552234	0.60053493804866	0.645600993120501	0.228622710731897	1.8230937818201
LYjIgy	renal_carcinoma	outcome	cg08884395	Simple mode	9	-0.841707588731456	0.837569477573737	0.344350016478608	-2.48334376477598	0.799928587313068	0.430973968449487	0.0834636755794419	2.22538200230963
LYjIgy	renal_carcinoma	outcome	cg08884395	Weighted mode	9	-0.44175323033517	0.644554310135067	0.512481532874995	-1.7050796781999	0.821573217529561	0.642908266139458	0.181757903455832	2.27407463891047
MUjuf5	renal_carcinoma	outcome	cg12446953	MR Egger	6	-0.749462157081332	1.72091380616219	0.68566769984097	-4.12245321715923	2.62352890299657	0.472620680080591	0.0162047119624022	13.7842812484479
MUjuf5	renal_carcinoma	outcome	cg12446953	Weighted median	6	-0.605621284708862	11.1853669798608	0.956820381509775	-22.528940565236	21.3176979958183	0.54573526431763	1.64363518439148e-10	1812001723.66776
MUjuf5	renal_carcinoma	outcome	cg12446953	Inverse variance weighted	6	-0.374307374657051	0.625542673183887	0.549591579940089	-1.60037101409747	0.851756264783368	0.687765477658065	0.201821625434207	2.34375950169141
MUjuf5	renal_carcinoma	outcome	cg12446953	Simple mode	6	1.08708325664527	1.3383595727412	0.453567624170179	-1.53610150592749	3.71026801921803	2.9656115177926	0.215218496108672	40.8647575997525
MUjuf5	renal_carcinoma	outcome	cg12446953	Weighted mode	6	-0.599536717507904	0.871735663375565	0.522207225053325	-2.30813861772401	1.1090651827082	0.549065949821487	0.0994461867581456	3.03152314916367
UcHTKP	renal_carcinoma	outcome	ENSG00000008710	MR Egger	18	-1.27960514976244	1.65386815496953	0.450386788600999	-4.52118673350273	1.96197643397785	0.278147105224122	0.010876108964027	7.11337229154733
UcHTKP	renal_carcinoma	outcome	ENSG00000008710	Weighted median	18	-0.492471666070713	12.1512385954402	0.967671773347929	-24.3088993131336	23.3239559809922	0.611114056079201	2.77191026758025e-11	13473033160.7591
UcHTKP	renal_carcinoma	outcome	ENSG00000008710	Inverse variance weighted	18	-1.67788494523288	0.914463774521144	0.0665309829040781	-3.47023394329432	0.11446405282856	0.186768584367907	0.0311097518918413	1.12127233377069
UcHTKP	renal_carcinoma	outcome	ENSG00000008710	Simple mode	18	-6.54523494482888	22.5738289639423	0.775362926423979	-50.7899397141557	37.699469824498	0.00143694643977819	8.75405852890239e-23	23586946145882100
UcHTKP	renal_carcinoma	outcome	ENSG00000008710	Weighted mode	18	-0.593407587423698	24.8162496715709	0.981201198092515	-49.2332569437027	48.0464417688553	0.552441580725743	4.15210361986204e-22	7.3502910345214e+20
